# Supplementary material for: Band alignment of Zr2CO2/MoS2 heterostructures under an electric field
Source: Royal Society of Chemistry journal article supplement (doi:10.1039/d1nj02440j), 2021-01-01
Supplement: d1nj02440j1.pdf [file d1nj02440j1.pdf]

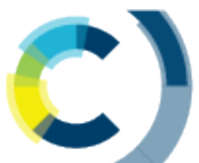

NJC

### Band alignment of Zr<sub>2</sub>CO<sub>2</sub>/MoS<sub>2</sub> heterostructure under electric field

|                               |                                                                                                                                                                                                                                                                                                                                                                                                                                                                                                                                                                   |
|-------------------------------|-------------------------------------------------------------------------------------------------------------------------------------------------------------------------------------------------------------------------------------------------------------------------------------------------------------------------------------------------------------------------------------------------------------------------------------------------------------------------------------------------------------------------------------------------------------------|
| Journal:                      | <i>New Journal of Chemistry</i>                                                                                                                                                                                                                                                                                                                                                                                                                                                                                                                                   |
| Manuscript ID                 | NJ-ART-05-2021-002440.R1                                                                                                                                                                                                                                                                                                                                                                                                                                                                                                                                          |
| Article Type:                 | Paper                                                                                                                                                                                                                                                                                                                                                                                                                                                                                                                                                             |
| Date Submitted by the Author: | n/a                                                                                                                                                                                                                                                                                                                                                                                                                                                                                                                                                               |
| Complete List of Authors:     | Chen, Zhangze ; Hebei University of Technology, school of Science<br>Ma, Xinguo; Hubei University of Technology<br>Hu, Jisong; Huazhong University of Science and Technology<br>Wan, Fengda; Hebei University of Technology,<br>Xu, Peng; Hubei University of Technology, School of Science<br>Guoyu, Wang; Hebei University of Technology<br>Mei, Wang; Hebei University of Technology<br>Deng, Shuiquan; Fujian Institute of Research on the Structure of Matter (FJIRSM), Chinese Academy of Sciences (CAS),<br>Huang, Chuyun; Hubei University of Technology, |
|                               |                                                                                                                                                                                                                                                                                                                                                                                                                                                                                                                                                                   |

SCHOLARONE™  
Manuscripts

# NJC

New Journal of Chemistry

A journal for new directions in chemistry

## Guidelines for Referees

Thank you very much for agreeing to review this manuscript for [New Journal of Chemistry](#).

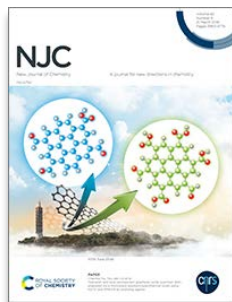

*NJC (New Journal of Chemistry)* is a broad-based primary journal encompassing all branches of chemistry and its sub-disciplines. It contains full research articles, communications, perspectives and focus articles.

*NJC's* Impact Factor is **3.288** (2019 Journal Citation Reports®)

---

*The following manuscript has been submitted for consideration as a*  
**PAPER**

---

**Papers** report a complete study that leads to new understanding or gives new insight into the subject under investigation. If preliminary results have been published in a communication, a subsequent full paper should include additional results that justify another publication.

We ask referees to **recommend only the most significant work** for publication in *NJC*. When making your recommendation please:

- **Comment** on the originality, importance, impact and scientific reliability of the work
- **Note that routine or incremental** work should not be recommended for publication.
- **Contact the Editor** if there is any conflict of interest, if the work has been previously published or if there is a significant part of the work which you are not able to referee with confidence.

Best regards,

Contact us

**Professor Jean-François Gérard**  
Editor-in-Chief, *NJC*

**Dr Andrew Shore**  
Executive Editor, *NJC*

Please visit our [reviewer hub](#) for further details of our processes, policies and reviewer responsibilities as well as guidance on how to review, or click the links below.

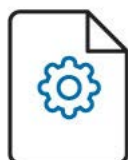

What to do  
when you  
review

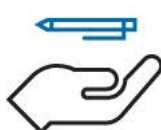

Reviewer  
responsibilities

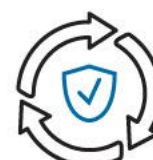

Process &  
policies

## Supplementary Information (SI)

### Band alignment of $Zr_2CO_2/MoS_2$ heterostructure under electric field

Zhangze Chen,<sup>a</sup> Xinguo Ma,<sup>\*a</sup> Jisong Hu,<sup>b</sup> Fengda Wan,<sup>a</sup> Peng Xu,<sup>a</sup> Guoyu Wang,<sup>a</sup> Mei Wang,<sup>a</sup> Shuiquan Deng<sup>\*c</sup> and Chuyun Huang<sup>a</sup>

<sup>a</sup> School of Science, Hubei University of Technology, Wuhan 430068, China. E-mail: maxg2013@sohu.com

<sup>b</sup> School of Optical and Electronic Information, Huazhong University of Science and Technology, Wuhan 430074, China. E-mail: jisong.hu@outlook.com

<sup>c</sup> Fujian Institute of Research on the Structure of Mater, Chinese Academy of Sciences, Fuzhou 350002, China. E-mail: sdeng@fjirsm.ac.cn

#### 1. Cohesive energies of $Ti_2CO_2/MoS_2$ heterostructures

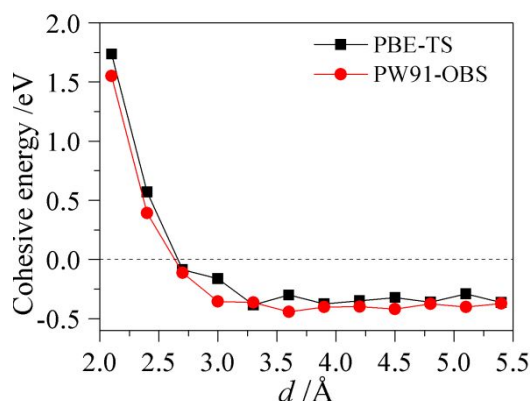

**Figure S1.** Cohesive energies of  $Ti_2CO_2/MoS_2$  heterostructures with different interlayer spacing using PBE-TS and PW91-OBS.

#### 2. Energy band structure of $MoS_2$

The state-of-the-art hybrid DFT approach based on the Heyd-Scuseria-Ernzerhof functional (HSE06) was used to calculate the electronic structures of  $MoS_2$  after geometric optimization. In the default hybrid functional HSE06, the screening parameter  $\mu$  and the mixing parameter  $\alpha$  are set as  $0.21 \text{ \AA}^{-1}$  and 0.25, respectively. And norm-conserving pseudopotentials were used for all-electron HSE06 calculations. The calculated band gap of monolayer  $MoS_2$  is 2.29 eV at the high symmetry K point, which is slightly larger than the experimental band gap of about 1.80 eV.

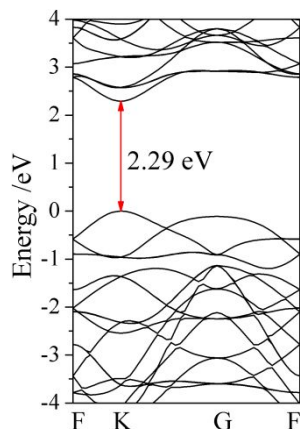

**Figure S2.** Energy band structure of monolayer MoS<sub>2</sub> using hybrid functional HSE06.

#### References

- (1) J. Heyd, G. E. Scuseria, M. Ernzerhof, Hybrid Functionals Based on a Screened Coulomb Potential. *J. Chem. Phys.* 2003, **118**, 8207–8215.
- (2) J. S. Lin, A. Qteish, M. C. Payne, V. Heine, Optimized and Transferable Nonlocal Separable Ab Initio Pseudopotentials. *Phys. Rev. B* 1993, **47**, 4174–4180.
- (3) K. F. Mak, C. Lee, J. Hone, J. Shan, T. F. Heinz, Atomically Thin MoS<sub>2</sub>: A New Direct-Gap Semiconductor. *Phys. Rev. Lett.* 2010, **105**, 2–5.

### 3. Definition of charge density difference

The charge density difference is defined as

$$\Delta\rho = \rho_{\text{Zr}_2\text{CO}_2/\text{MoS}_2} - \rho_{\text{Zr}_2\text{CO}_2} - \rho_{\text{MoS}_2} \quad (\text{S1})$$

where  $\rho_{\text{Zr}_2\text{CO}_2/\text{MoS}_2}$ ,  $\rho_{\text{Zr}_2\text{CO}_2}$  and  $\rho_{\text{MoS}_2}$  represent the charge densities of Zr<sub>2</sub>CO<sub>2</sub>/MoS<sub>2</sub> heterostructures, isolated Zr<sub>2</sub>CO<sub>2</sub> and MoS<sub>2</sub> layers, respectively. Namely, the charge density difference can be obtained by subtracting the electronic charge density of Zr<sub>2</sub>CO<sub>2</sub>/MoS<sub>2</sub> heterostructure from those of the corresponding isolated Zr<sub>2</sub>CO<sub>2</sub> and MoS<sub>2</sub> layers, respectively.

#### 4. The stereo charge density differences of $Zr_2CO_2/MoS_2$ heterostructures

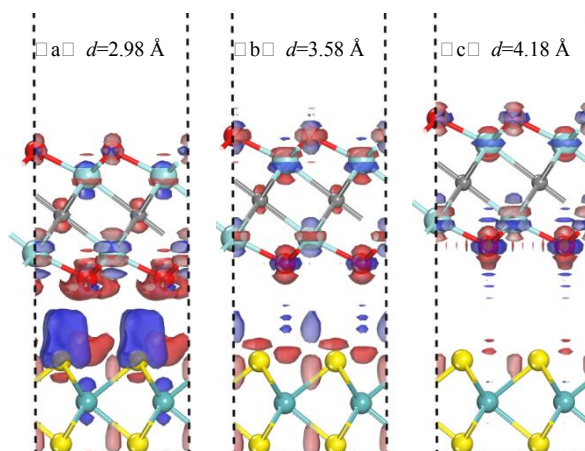

**Figure S3.** The stereo charge density differences of  $Zr_2CO_2/MoS_2$  heterostructures for three different interlayer spacings using PBE-TS, in which red and blue isosurfaces denote charge augmentation and diminution in the space, respectively. The isovalue of  $0.0005 \text{ e}/\text{\AA}^{-3}$  is chosen to plot the isosurface.

#### 5. Definition of CB and VB edge potentials

The band edge energies of CB and VB of  $MoS_2$  and  $Zr_2CO_2$  from electronegativity and BG of semiconductor are defined as

$$E_{VB} = \chi + 0.5E_g + E_e \quad (S2)$$

$$E_{CB} = E_{VB} - E_g \quad (S3)$$

where  $\chi$  is the average absolute electronegativity of semiconductor.  $E_e$  is the energy of free electron on the hydrogen scale (4.5 eV). And  $E_{CB}$ ,  $E_{VB}$ ,  $E_g$  are the band edge energies of the CB, VB and BG of semiconductor, respectively.

## 6. Optical absorption coefficient spectra

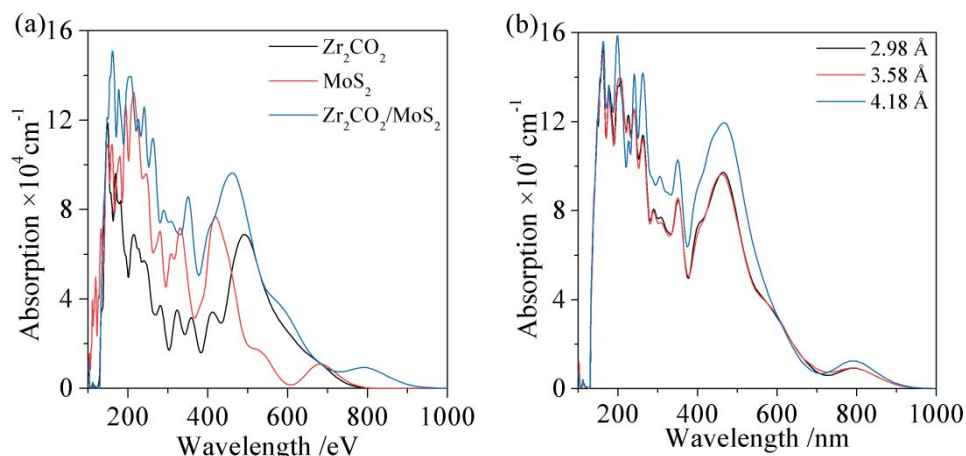

**Fig. S4.** Calculated total optical absorption coefficient spectra of (a) isolated system and (b)  $\text{Zr}_2\text{CO}_2/\text{MoS}_2$  heterostructure with different interlayer spacings using PBE-TS.

## 7. Energy band structures of $\text{Zr}_2\text{CO}_2/\text{MoS}_2$ heterostructures under the $E_{\text{field}}$

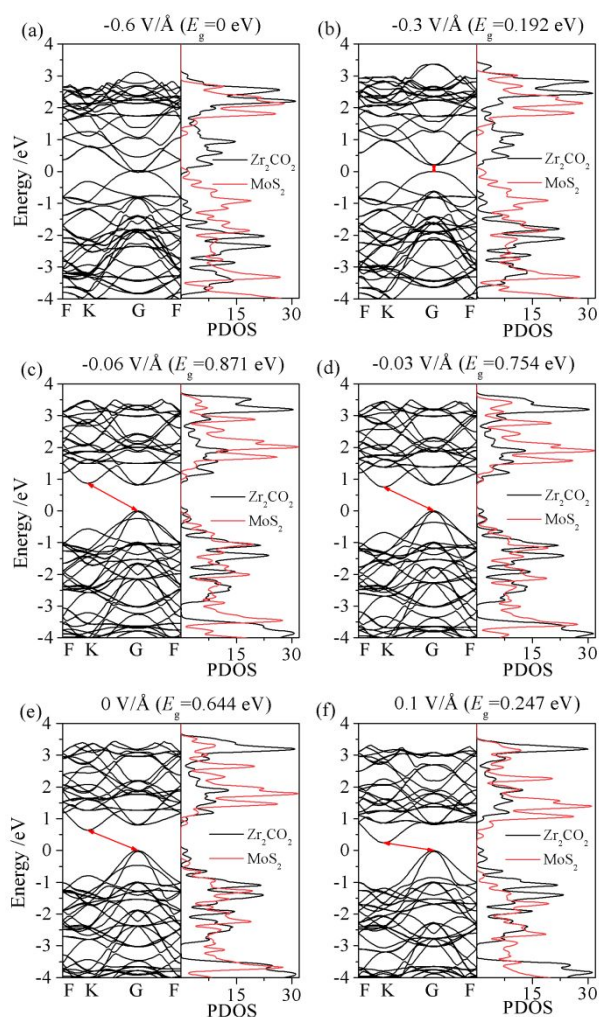

**Figure S5.** Energy band structures of  $\text{Zr}_2\text{CO}_2/\text{MoS}_2$  heterostructures with different  $E_{\text{field}}$ .
